# Supplementary material for: Establishing a method for the cryopreservation of viable peripheral blood mononuclear cells in the International Space Station
Source: PubMed Central journal article supplement — NPJ Microgravity. 2024 Aug 9;10:84. doi: 10.1038/s41526-024-00423-2 (PMC11315897; doi:10.1038/s41526-024-00423-2), 2024-08-09
Supplement: 41526_2024_423_MOESM1_ESM.pdf [file 41526_2024_423_MOESM1_ESM.pdf]

## Supplementary information

### **Title: Establishing a method for the cryopreservation of viable peripheral blood mononuclear cells in the International Space Station**

Hiroto Ishii<sup>1, 2, 5</sup>, Rin Endo<sup>1, 2, 5</sup>, Sanae Hamanaka<sup>3, 5, #</sup>, Nobuyuki Hidaka<sup>3, 5</sup>, Maki Miyauchi<sup>1, 2</sup>, Naho Hagiwara<sup>1</sup>, Takahisa Miyao<sup>1</sup>, Tohru Yamamori<sup>4</sup>, Tatsuya Aiba<sup>3</sup>, Nobuko Akiyama<sup>1, 2</sup> and Taishin Akiyama<sup>1, 2, \*</sup>

1. Laboratory for Immune Homeostasis, RIKEN Center of Integrative Medical Sciences, Yokohama 230-0045, Japan
2. Immunobiology, Graduate School of Medical Life Science, Yokohama City University, Yokohama 230-0045, Japan
3. Space Biomedical Research Group, Human Spaceflight Technology Directorate, JAXA, Tsukuba 305-8505, Japan
4. Japan Space Forum, Tokyo 101-0062, Japan
5. These authors contributed equally to this study

# Contact information for BMX: Sanae Hamanaka, Ph D.

E-mail: [hamanaka.sanae@jaxa.jp](mailto:hamanaka.sanae@jaxa.jp)

\*Corresponding author: Taishin Akiyama, Ph.D

Postal address: 1-7-22 Suehiro-cho, Tsurumi-ku, Yokohama 230-0045, Japan

E-mail: [taishin.akiyama@riken.jp](mailto:taishin.akiyama@riken.jp)

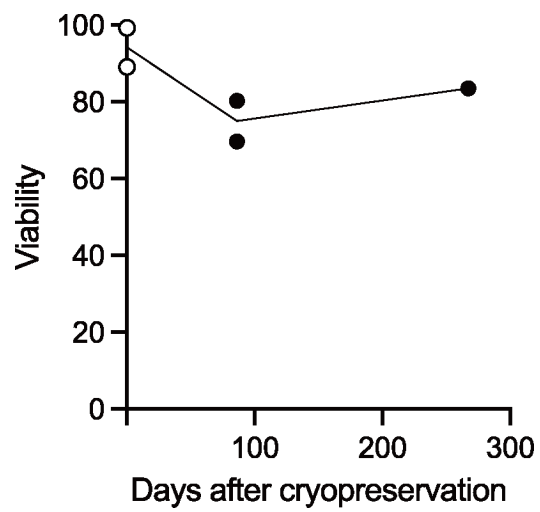

**Supplementary Figure 1.**

Cell viability after the long-term cryopreservation. Time 0 (open circles) indicates the sample without freezing. After wrapping with paper towels, cryopreserved samples in the CP-1 (1.5 ml tube) were stored at  $-80^{\circ}\text{C}$  for 86 days (N = 2) and 267 days (N = 1).

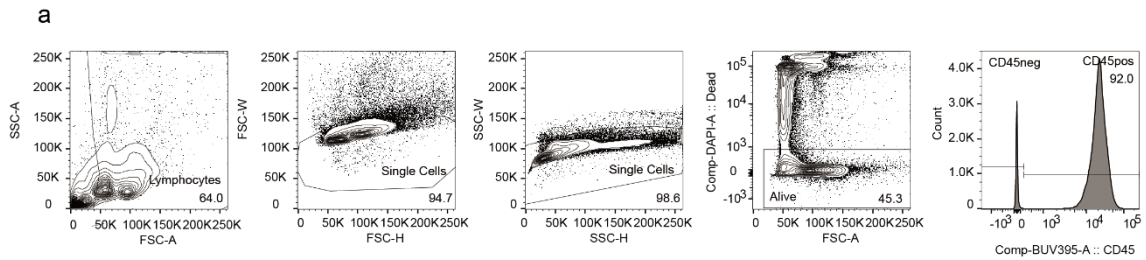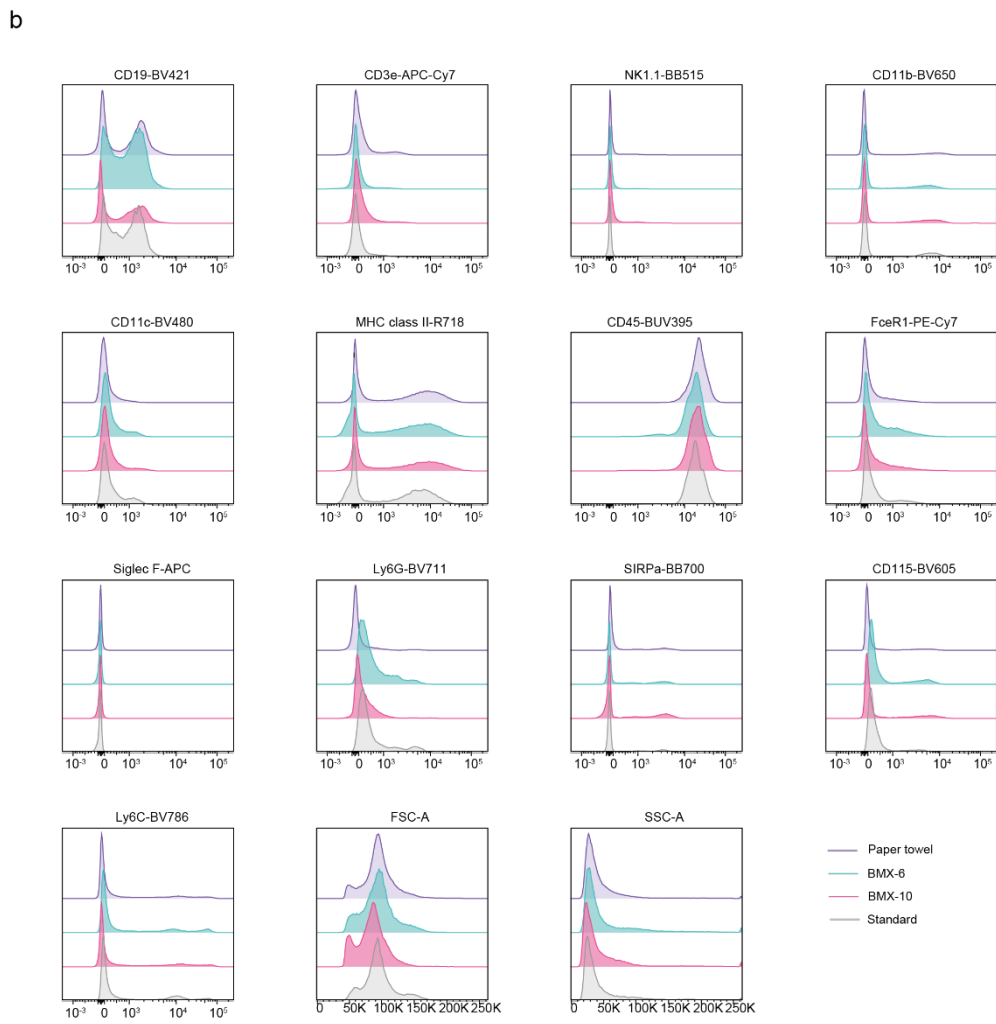

**Supplementary Figure 2. Gating strategy for flow cytometric analysis**

**a.** Gating strategy for CD45<sup>+</sup> cells.

**b.** Flow cytometric profile of each cell surface marker. Typical data of each sample was exhibited.

Purple histograms for wrapping by paper towel, blue histograms for BMX-6, red histograms for BMX-10, and gray histograms for the standard method involving the cryopreservation after the removal of red blood cells by hemolysis.
